# Supplementary material for: Changes of air pollutant emissions in China during two clean air action periods derived from the newly developed Inversed Emission Inventory for Chinese Air Quality (CAQIEI)
Source: Copernicus journal article supplement (doi:10.5194/essd-2023-477), 2023-12-21
Supplement: Supplementary file 1 [file essd-2023-477-supplement.pdf]

# Supplementary Material

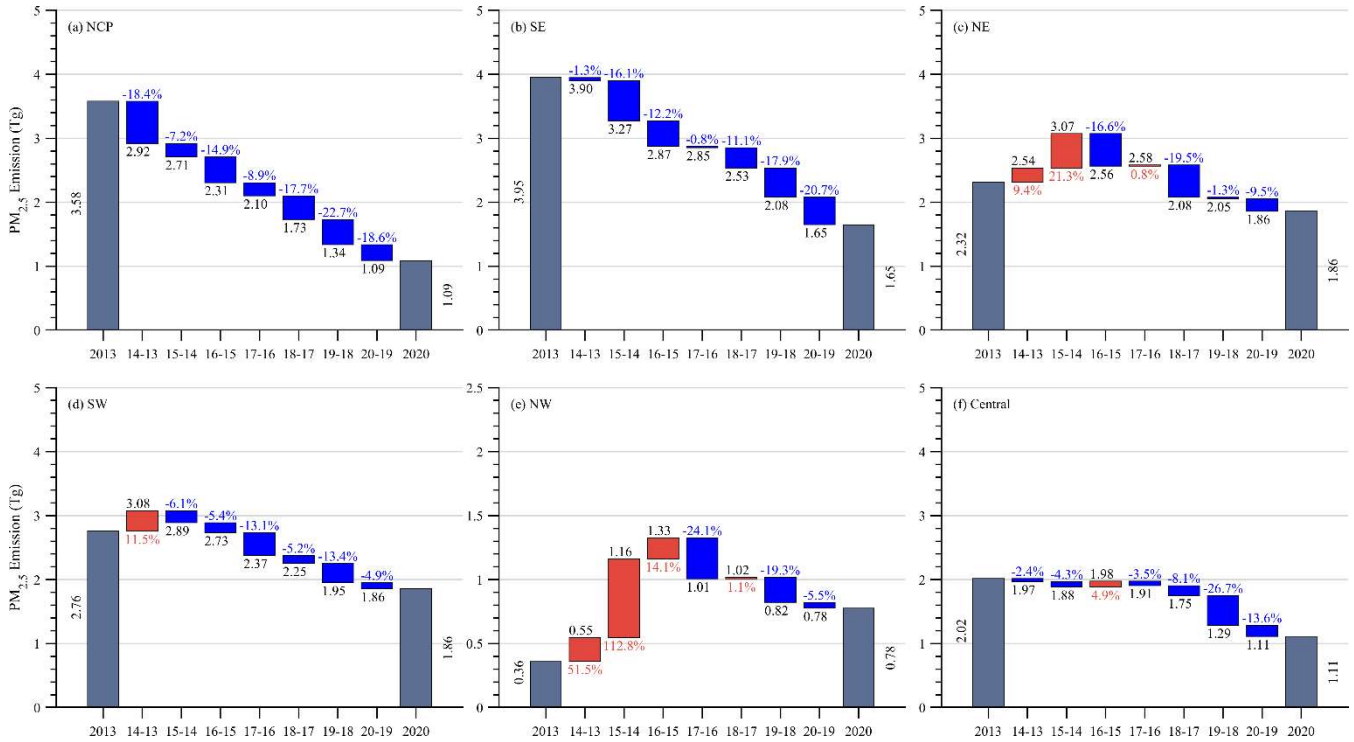

Figure S1: Emission changes of PM<sub>2.5</sub> from 2013 to 2020 over different regions of China obtained from CAQIEL.

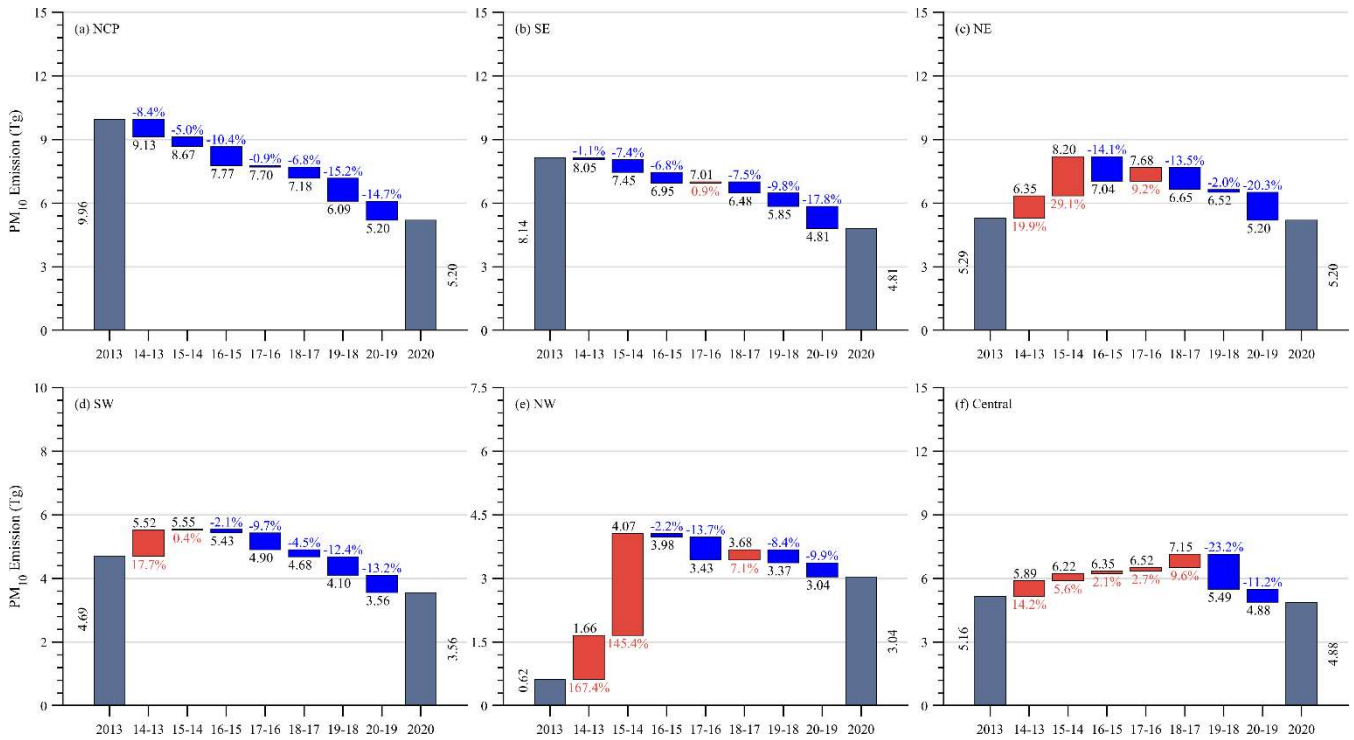

Figure S2: Same as Fig. S1 but for PM<sub>10</sub>.

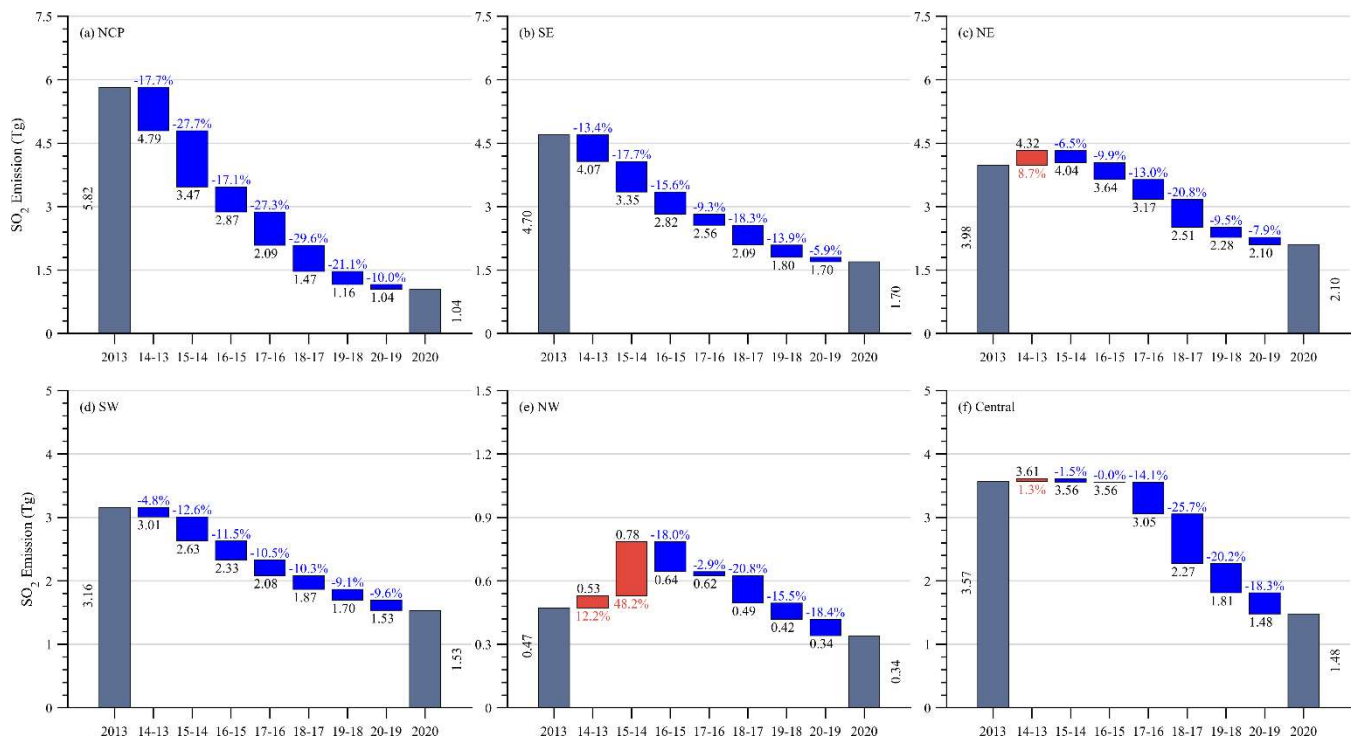

Figure S3: Same as Fig. S1 but for SO<sub>2</sub>.

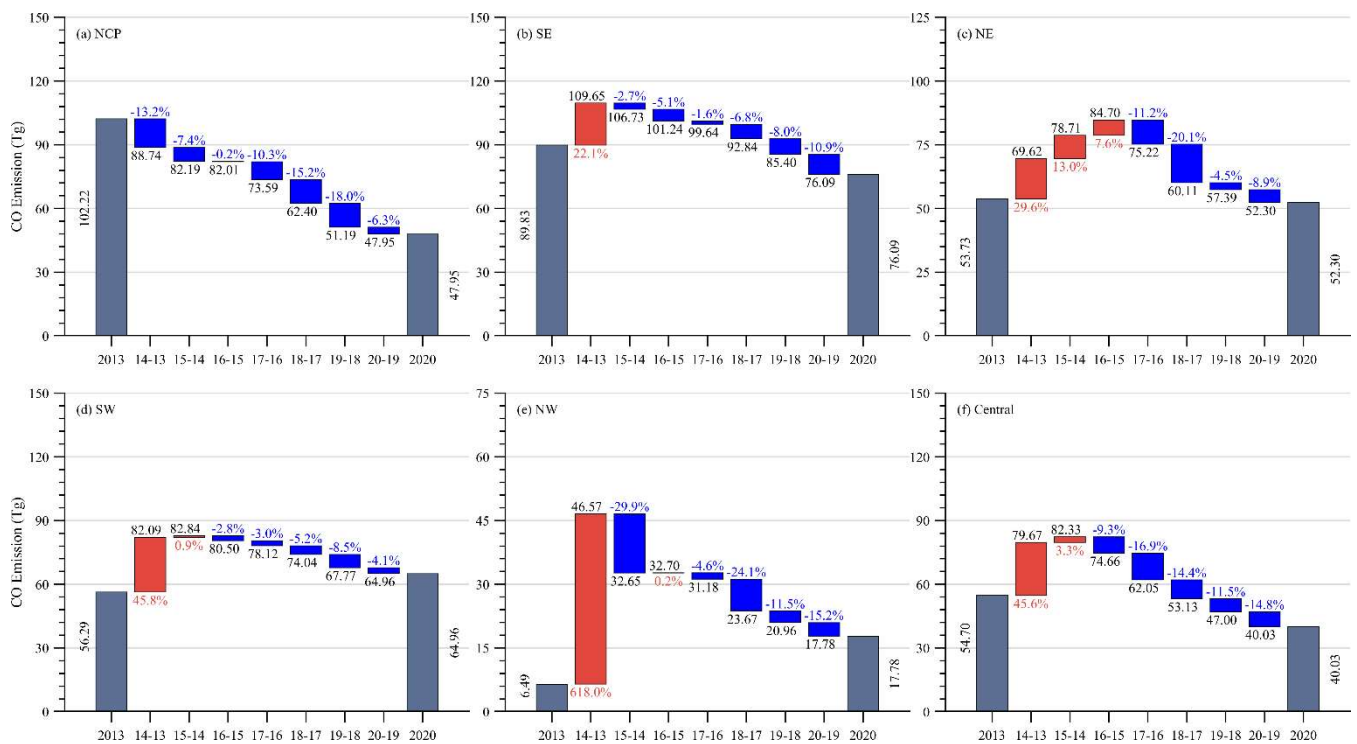

Figure S4: Same as Fig. S1 but for CO.

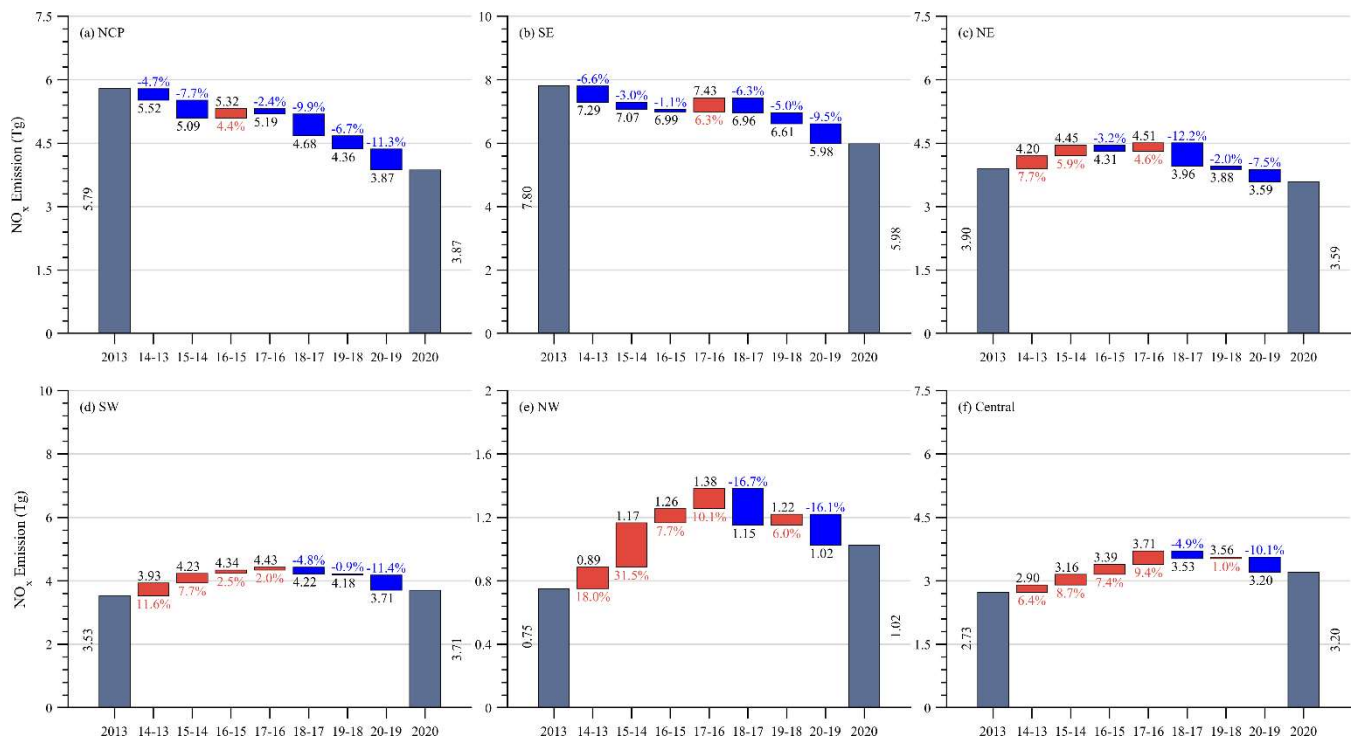

Figure S5: Same as Fig. S1 but for NO<sub>x</sub>.

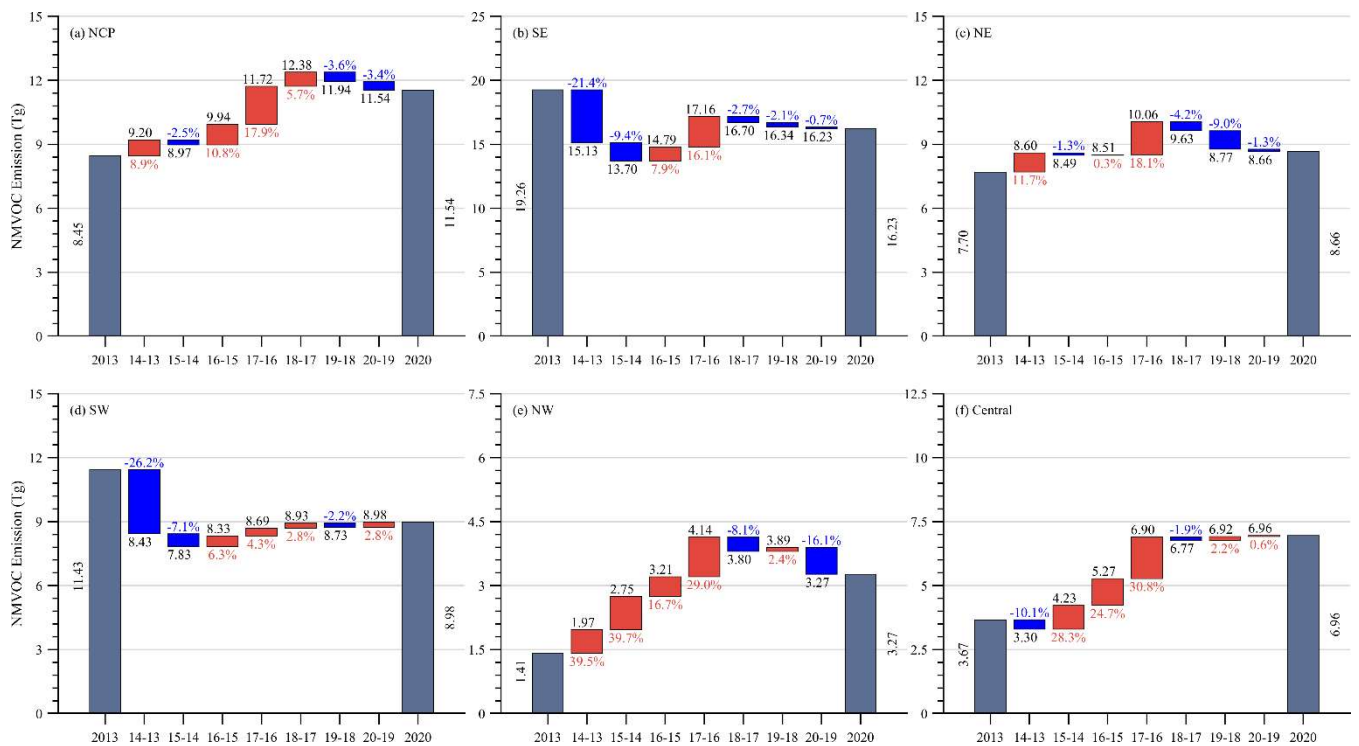

Figure S6: Same as Fig. S1 but for NMVOC.

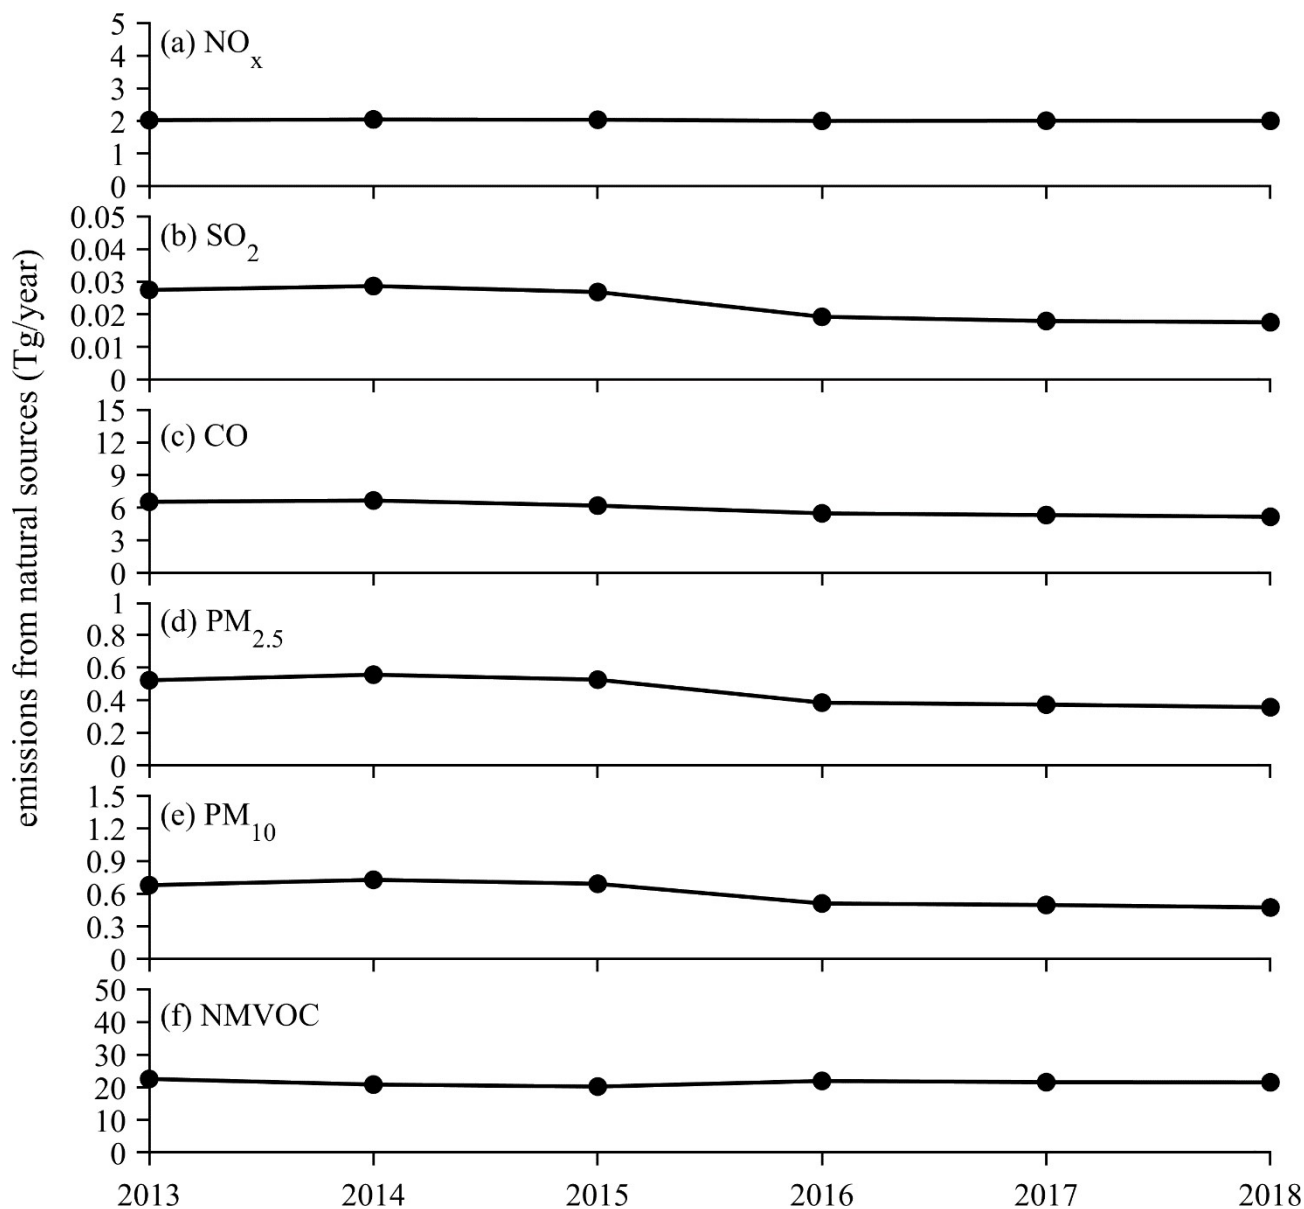

Figure S7: Time series of annual natural emissions of (a) NO<sub>x</sub>, (b) SO<sub>2</sub>, (c) CO, (d) PM<sub>2.5</sub>, (e) PM<sub>10</sub> and (f) NMVOC in China from 2013 to 2018. The considered natural sources includes the biogenic, biomass burning and soil emissions.

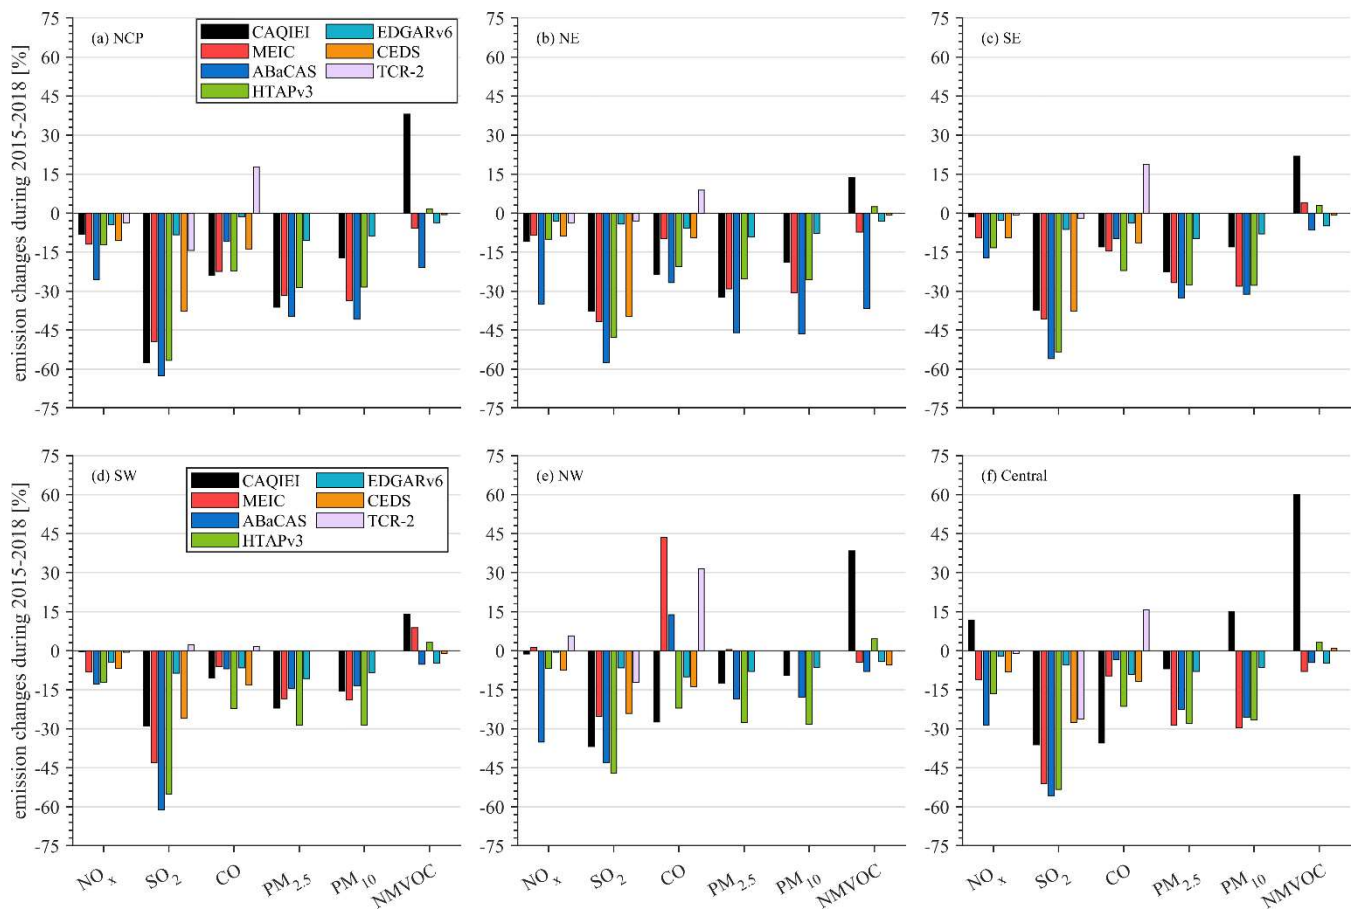

**Figure S8: Comparisons of the calculated emission changes of (a) NO<sub>x</sub>, (b) SO<sub>2</sub>, (c) CO, (d) PM<sub>2.5</sub>, (e) PM<sub>10</sub>, and (f) NMVOCs over different regions of China from 2015 to 2018 between CAQIEI and previous inventories.**
